# Supplementary material for: CD13-Mediated Pegylated Carboxymethyl Chitosan-Capped Mesoporous Silica Nanoparticles for Enhancing the Therapeutic Efficacy of Hepatocellular Carcinoma
Source: Pharmaceutics. 2023 Jan 28;15(2):426. doi: 10.3390/pharmaceutics15020426 (PMC9962034; doi:10.3390/pharmaceutics15020426)
Supplement: Supplementary file 1 [file pharmaceutics-15-00426-s001.zip › pharmaceutics-1969057-supplementary.pdf]

**Supplementary Information:**

**CD13-Mediated Pegylated Carboxymethyl Chitosan-Capped  
Mesoporous Silica Nanoparticles for Enhancing the  
Therapeutic Efficacy of Hepatocellular Carcinoma**

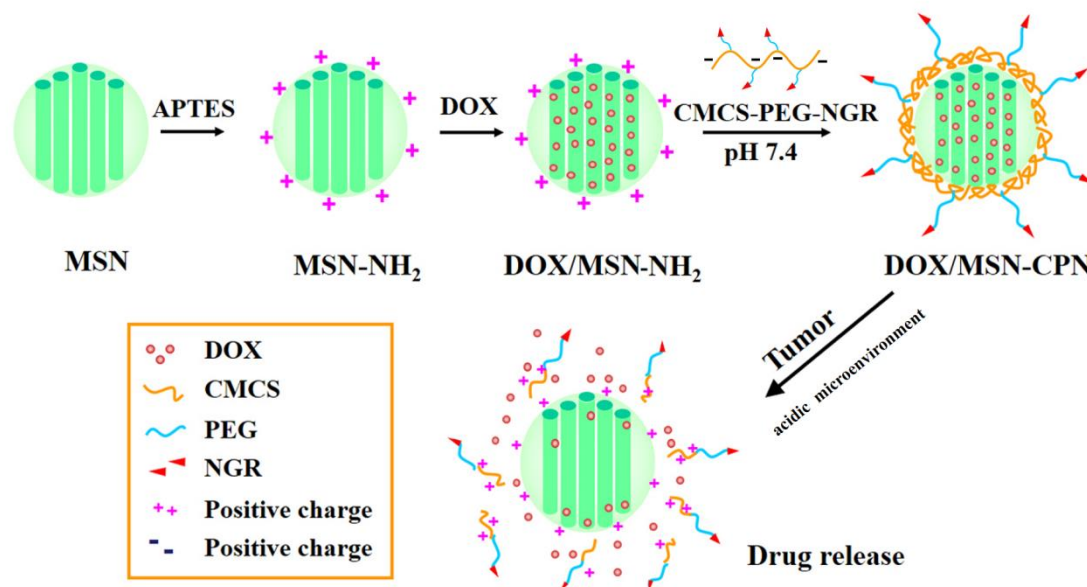

**Figure S1** Schematic illustration of the procedure for DOX/MSN-CPN preparation.

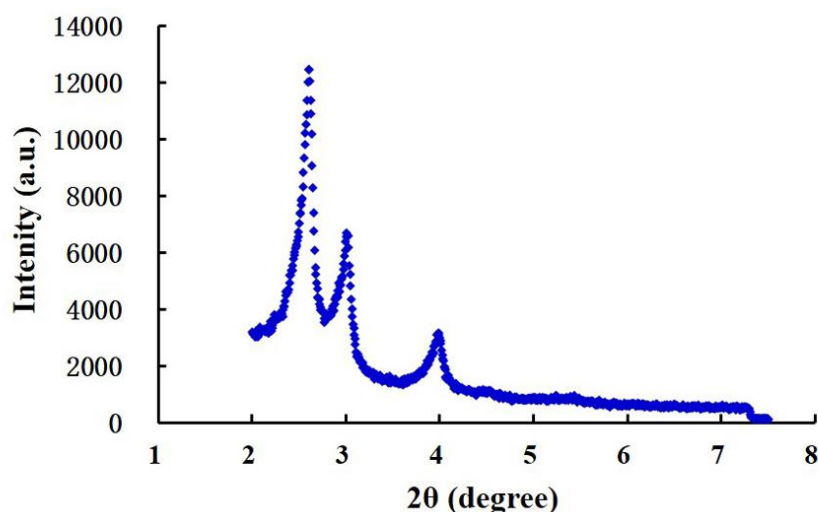

**Figure S2** Low angle XRD patterns of MSN-NH<sub>2</sub>.

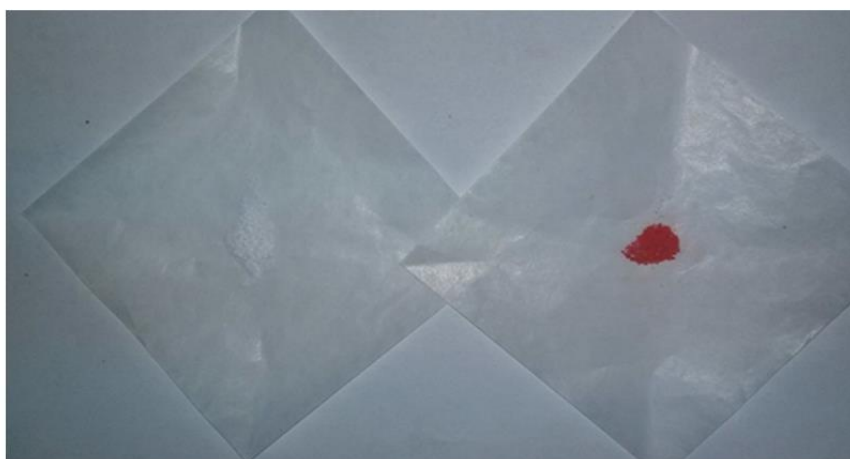

**Figure S3** The visual appearance of MSN-CPN (left) and DOX/MSN-CPN (right).
